# Supplementary material for: Mit Haarausfall umgehen
Source: Springer Nature journal article supplement (doi:10.1007/s00058-021-2194-x), 2022-01-01
Supplement: MOESM2 [file 19988078]

# Tabellen

## zum Beitrag „Mit Haarausfall umgehen“ von Marisol Azuara

Heilberufe (74) 1/2022, S. 36-39

Tab. 1: Zytostatika und Grad des Haarausfalls

| <b>Milder Haarausfall</b>  |                   |                |
|----------------------------|-------------------|----------------|
| Anagrelid                  | Doxorubicin Lipo. | Methotrexat    |
| Asparaginase               | Fludarabin        | Oxaliplatin    |
| Azacitidin                 | Gemcitabin        | Pemetrexed     |
| Bleomycin                  | Hydroxyurea       | Procarbazin    |
| Bortezomib                 | Lenalidomid       | Streptozotocin |
| Busulfan                   | Leucovorin        | Temozolomid    |
| Carboplatin                | Lomustin          | Temsirolimus   |
| Cisplatin                  | Mechlorethamin    | Thalidomid     |
| Carmustin                  | Mephalan          | Thioguanin     |
| Chlorambucil               | Mercaptopurin     |                |
| <b>Mäßiger Haarausfall</b> |                   |                |
| Capecitabin                | Mitomycin         | Vinblastin     |
| Cytosin-Arabinosid         | Mitoxantron       | Vincristin     |
| Dacarbazin                 | Raltitrexed       | Vindesin       |
| Luorouracil                | Treosulfan        | Vinorelbin     |
| <b>Starker Haarausfall</b> |                   |                |
| Actinomycin                | Doxorubicin       | Ifosfamid      |
| Amsacrin                   | Epirubicin        | Irinotecan     |
| Cyclophosphamid            | Etoposid          | Paclitaxel     |
| Daunorubicin               | Etoposid-Phosphat | Topotecan      |
| Docetaxel                  | Idarubicin        |                |

(Fellinger, Kroner, 2011)

Tab. 2: 6 Etappen des körperlichen Trauerprozesses

| Sechs Etappen des körperlichen Trauerprozesses:                                                                                                                                                                                                                                                                                                                                                                                                                                                                                                                                                      |
|------------------------------------------------------------------------------------------------------------------------------------------------------------------------------------------------------------------------------------------------------------------------------------------------------------------------------------------------------------------------------------------------------------------------------------------------------------------------------------------------------------------------------------------------------------------------------------------------------|
| <ol style="list-style-type: none"><li>1. Schock, wo der Patient den Verlust erfährt</li><li>2. Verweigerung, deren Manifestation die Ablehnung oder Verdrängung des Geschehens ist</li><li>3. Verhandlung, wo Vereinbarungen oder Pakte geschlossen werden und ein Dialog mit der Situation entsteht</li><li>4. Zorn, in welcher sich der Patient ärgert oder Nonkonformismus zeigt</li><li>5. Depression, in welcher Apathie, Desinteresse und Insomnie vorkommen</li><li>6. Akzeptanz, in welcher der Patient die eigene Situation erkennt und eine gewisse psychische Stabilität zeigt.</li></ol> |

*(Lluch-Hernández et al., 2007)*
